# Supplementary material for: Toxicity of lanthanum oxide (La2O3) nanoparticles in aquatic environments
Source: Royal Society of Chemistry journal article supplement (doi:10.1039/c5em00035a), 2015-01-01
Supplement: c5em00035a1.pdf [file c5em00035a1.pdf]

## **Toxicity of lanthanum oxide (La<sub>2</sub>O<sub>3</sub>) nanoparticles in aquatic environments**

**Brabu Balusamy,<sup>\*a,b</sup> Burcu Ertit Taştan,<sup>a,c</sup> Seyda Fikirdesici Ergen,<sup>f</sup> Tamer Uyar<sup>b,e</sup> and Turgay Tekinay<sup>\*a,d</sup>**

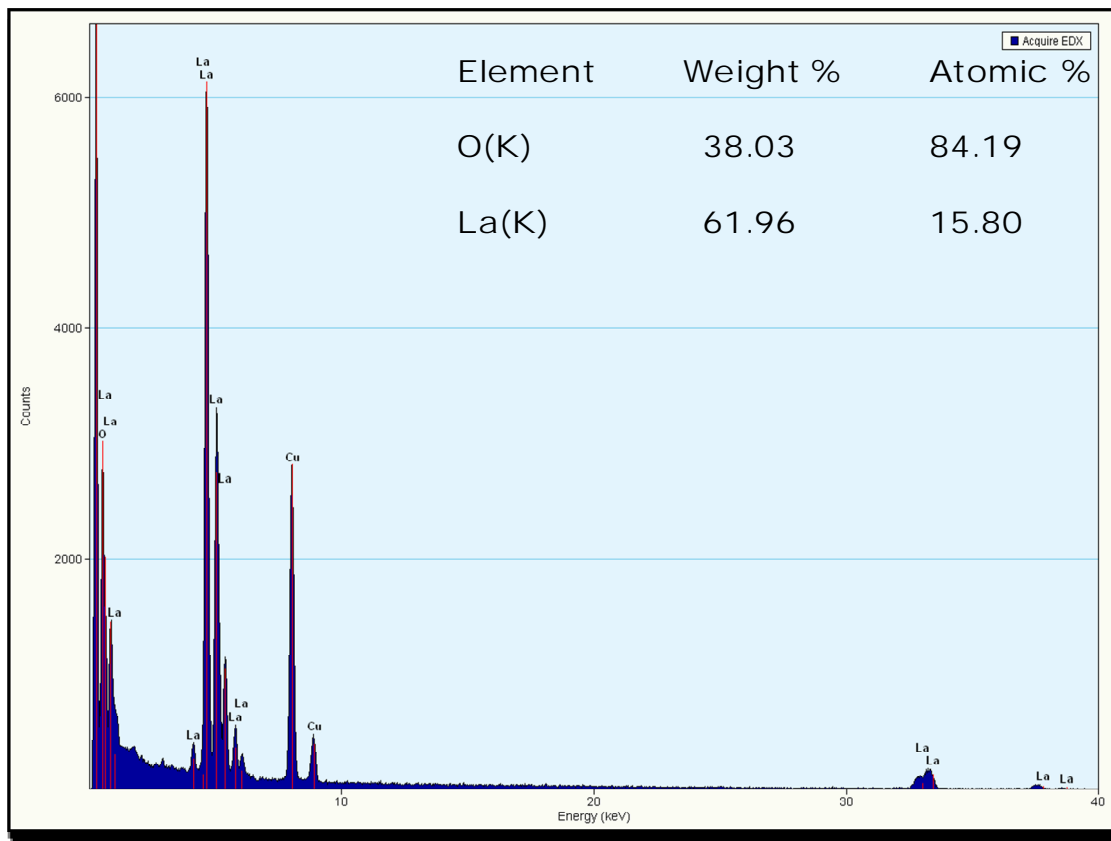

**Figure S1: TEM EDS spectra of La<sub>2</sub>O<sub>3</sub> NP. The peaks confirm the presence of lanthanum (La-61.96%) and oxygen (O- 38.03%).**

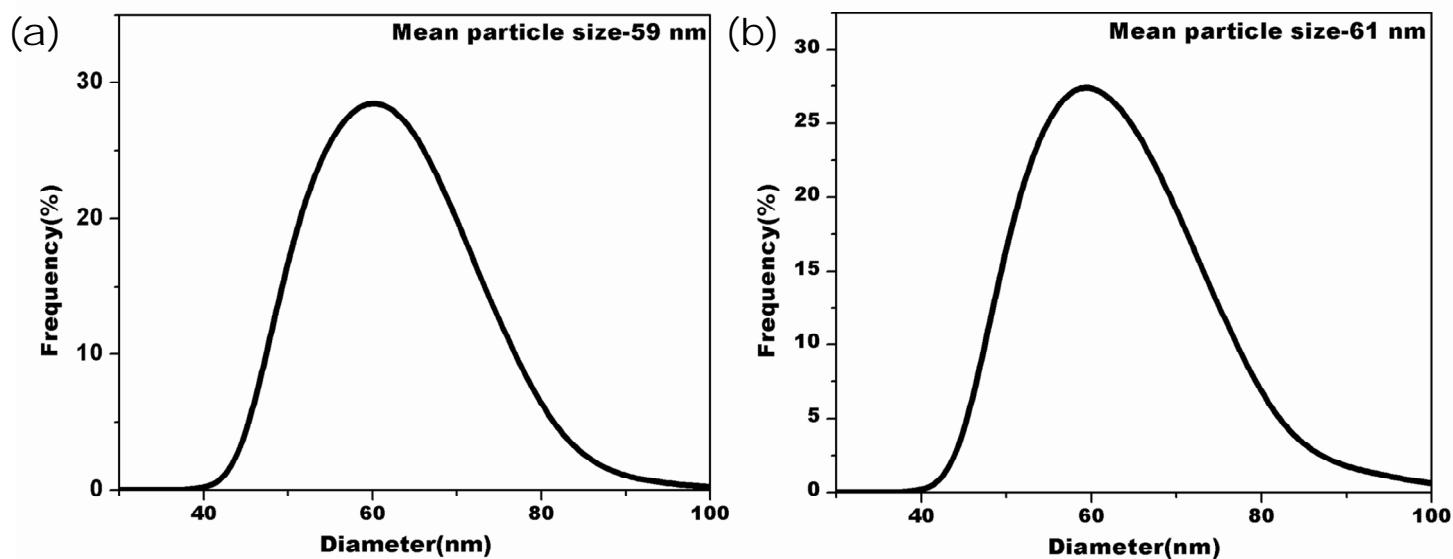

**Figure S2: DLS analysis of  $\text{La}_2\text{O}_3$  NP (a) ISO test medium and (b) BG 11 medium. The distribution graph indicates the mean particle size is 59 nm in ISO test medium and 61 nm in BG 11 medium.**

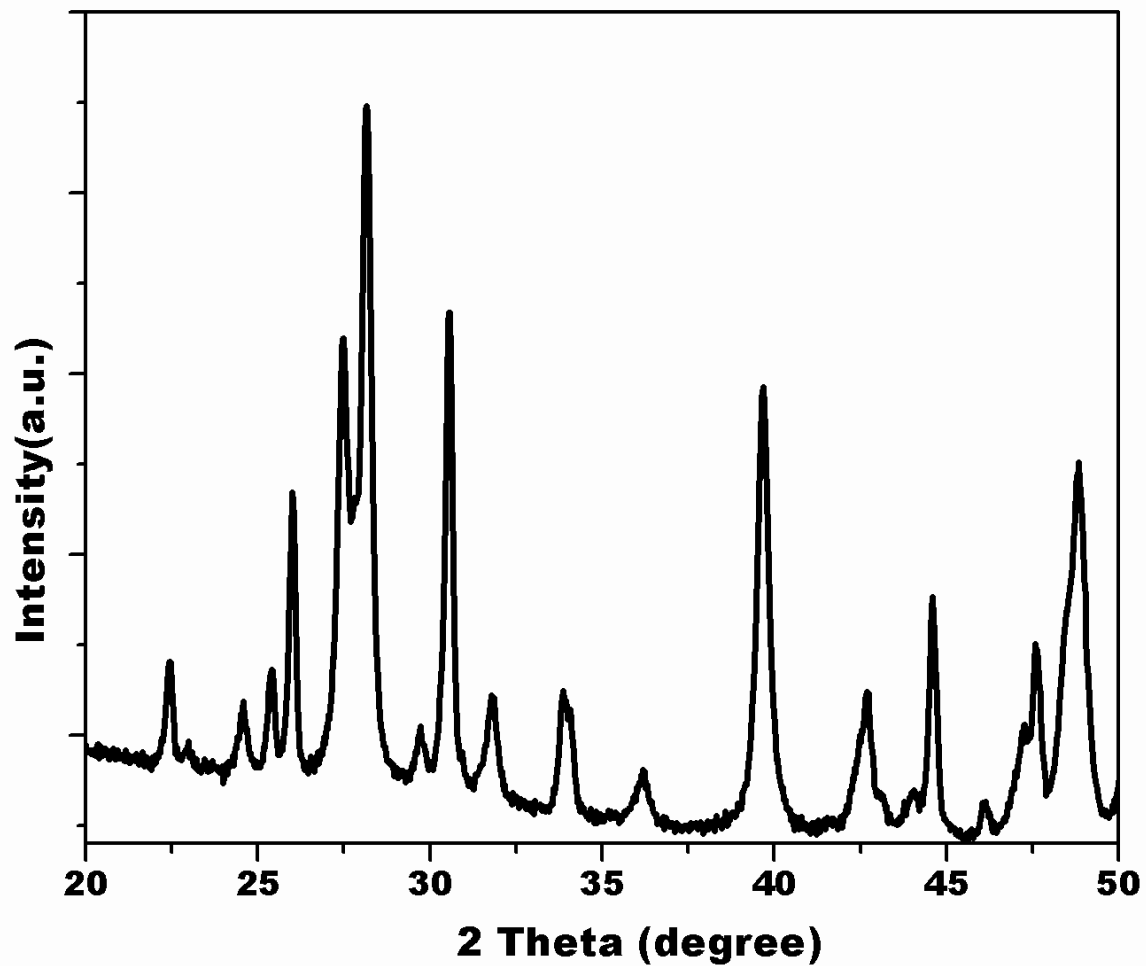

Figure S3: XRD Spectra of  $\text{La}_2\text{O}_3$  NP. The diffraction peaks are consistent with the values of standard card JCPDS file 65-3185.

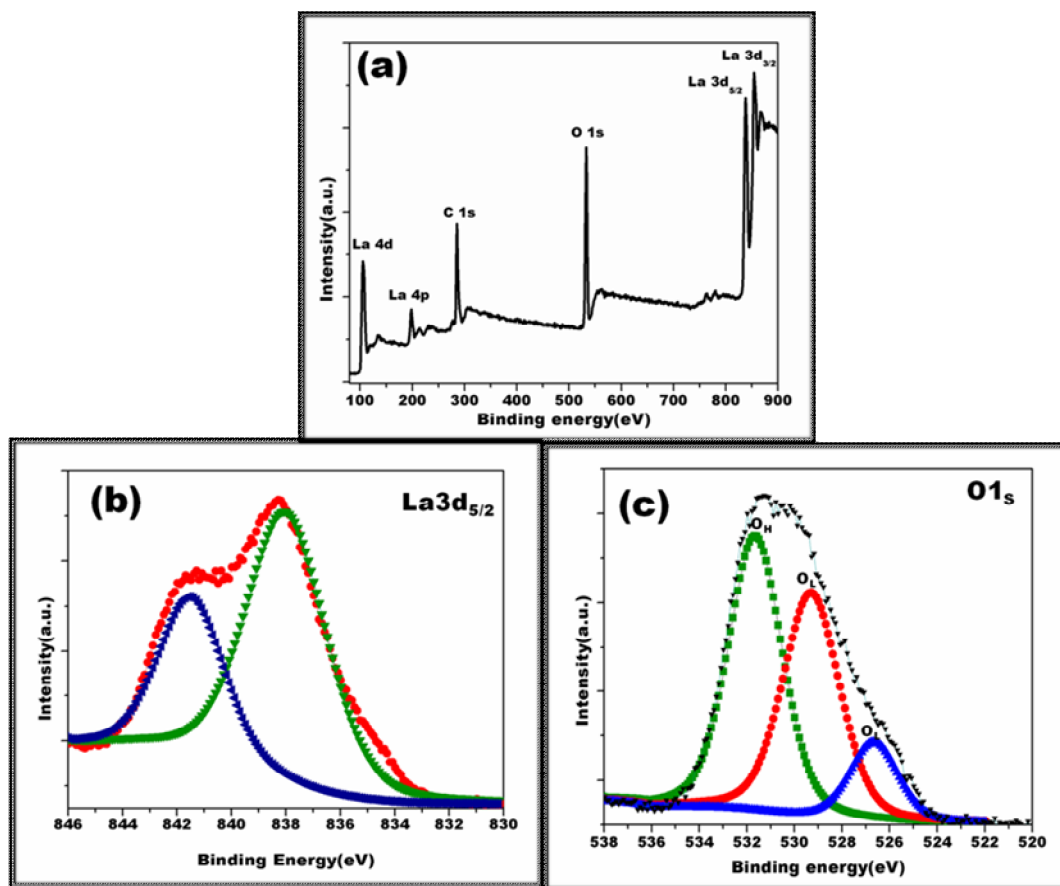

Figure S4: XPS Spectra of  $\text{La}_2\text{O}_3$  NP. (a) Survey spectrum (b) La 3d region and (c) O 1s region.

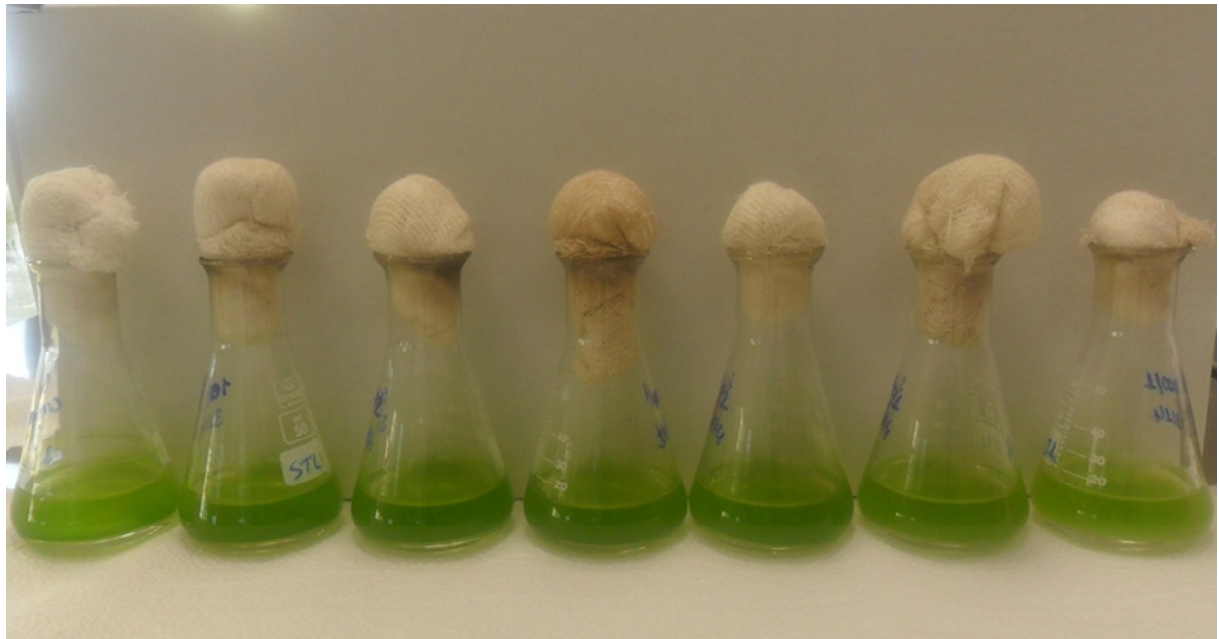

**Figure S5: Photograph of the *Chlorella sp.*, culture flasks following 72 h exposure. The visual observation of increase in chlorophyll content production is clearly seen over control culture. The flask left to right contains 0, 10, 50, 100, 250, 500 and 1000 mg/L of  $\text{La}_2\text{O}_3$  NP.**

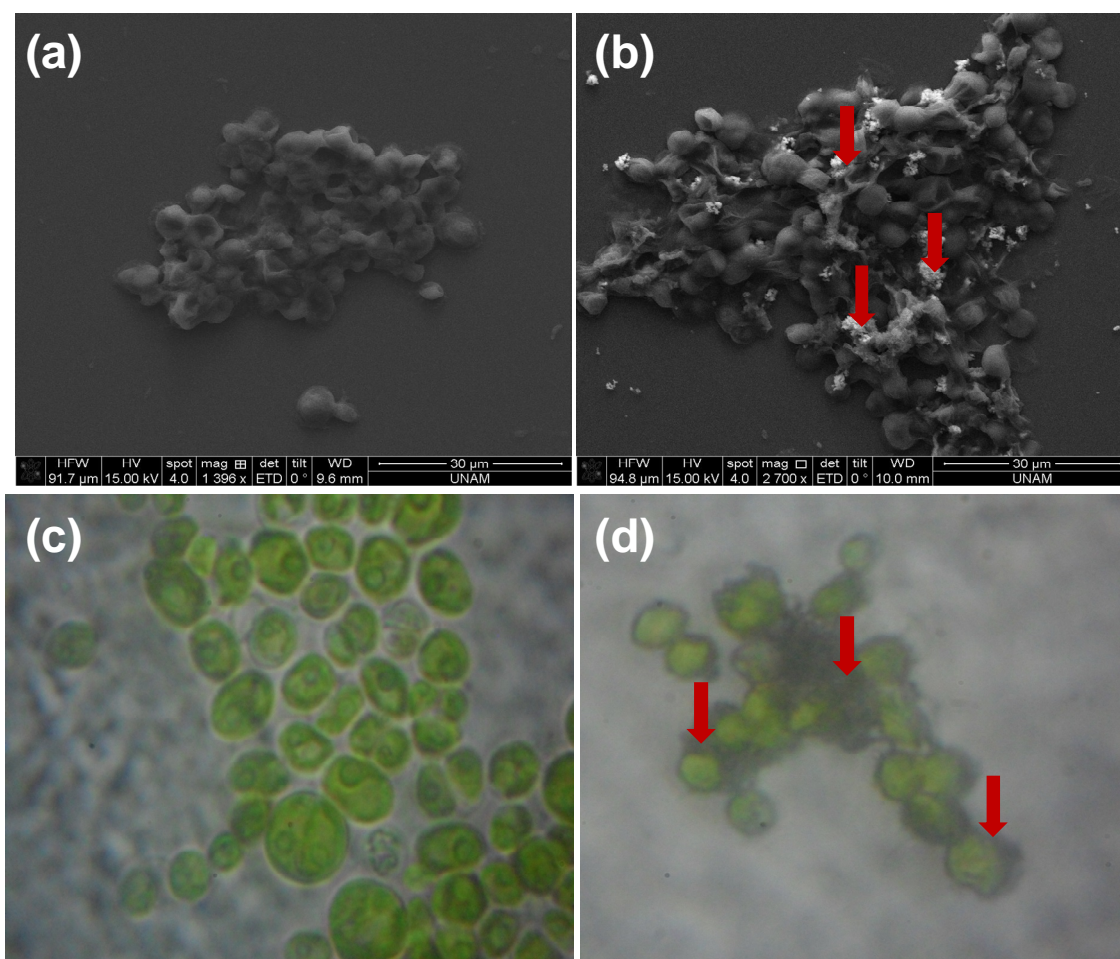

**Figure S6: Microscopy image of *Chlorella sp.*, (a) & (b) SEM image before and after treatment. (c) & (d) OM image before and after treatment. The attachment of  $\text{La}_2\text{O}_3$  NP with algae is clearly seen following the exposure for 72 h. The red arrows indicate attachment of  $\text{La}_2\text{O}_3$  NP.**

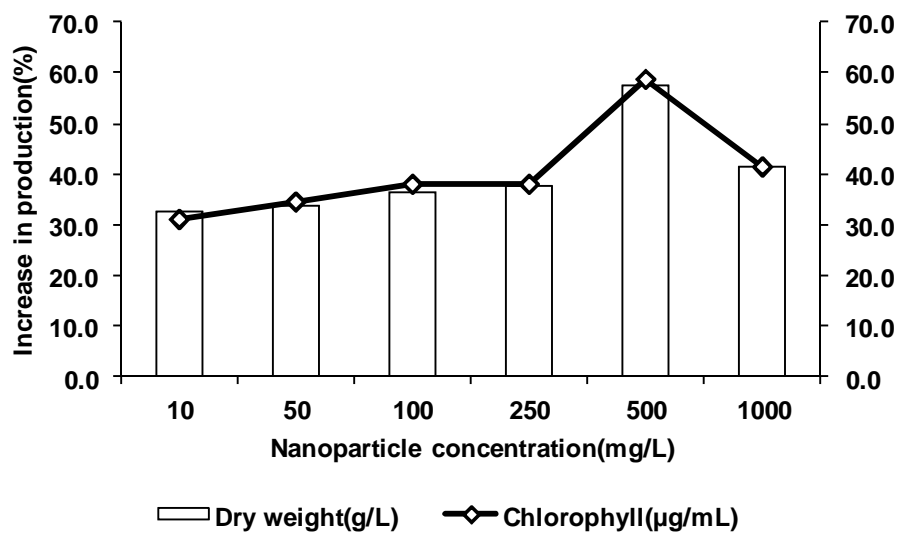

**Figure S7: Effect of  $\text{La}_2\text{O}_3$  NP on the biomass and chlorophyll content production. The curve shows that the acute exposure treatment significantly enhanced the production.**



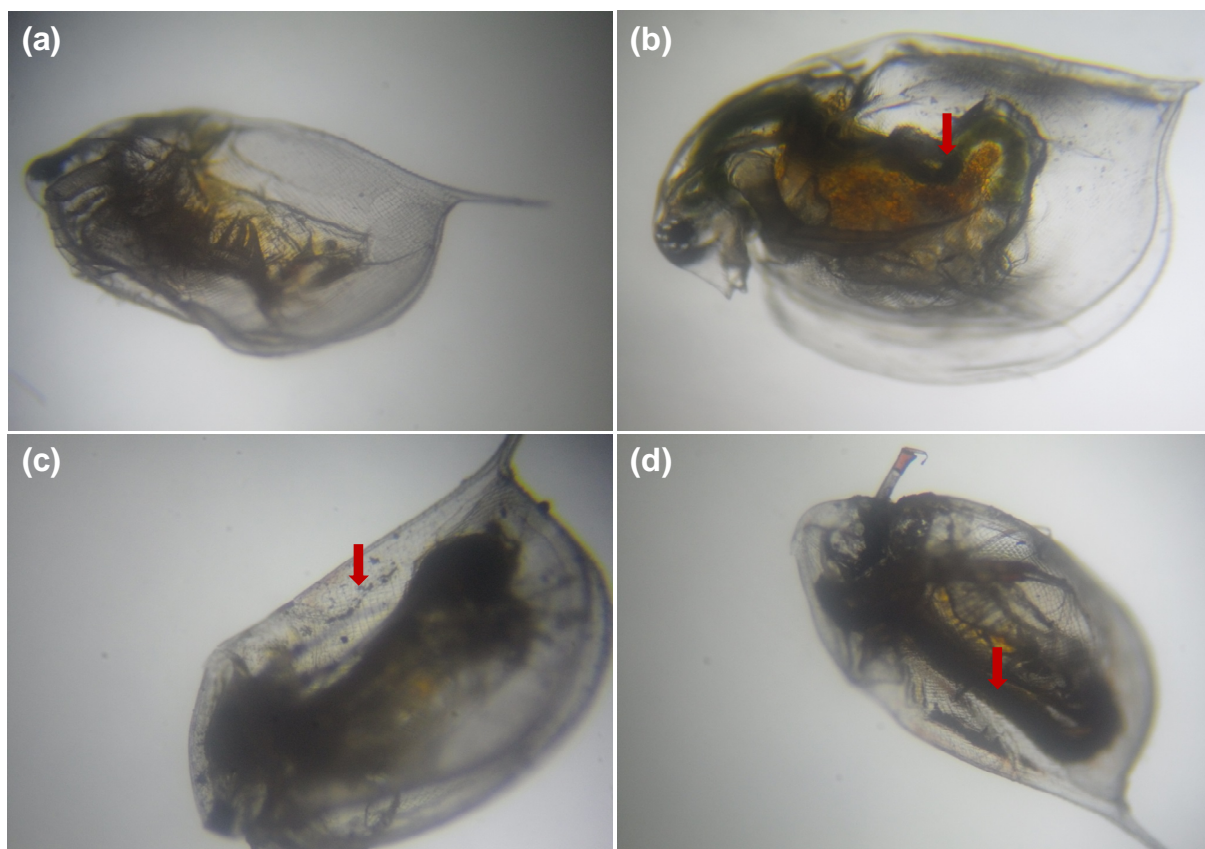

**Figure S8: OM image of *D. magna* (a) Control (b) Fed with micro algae *Chlorella sp.*, (c & d) after 48 h exposure to  $\text{La}_2\text{O}_3$  NP. Attachment of nanoparticle on the carapace and accumulation in intestinal tract is observed. The red arrows indicate attachment and accumulation of  $\text{La}_2\text{O}_3$  NP.**

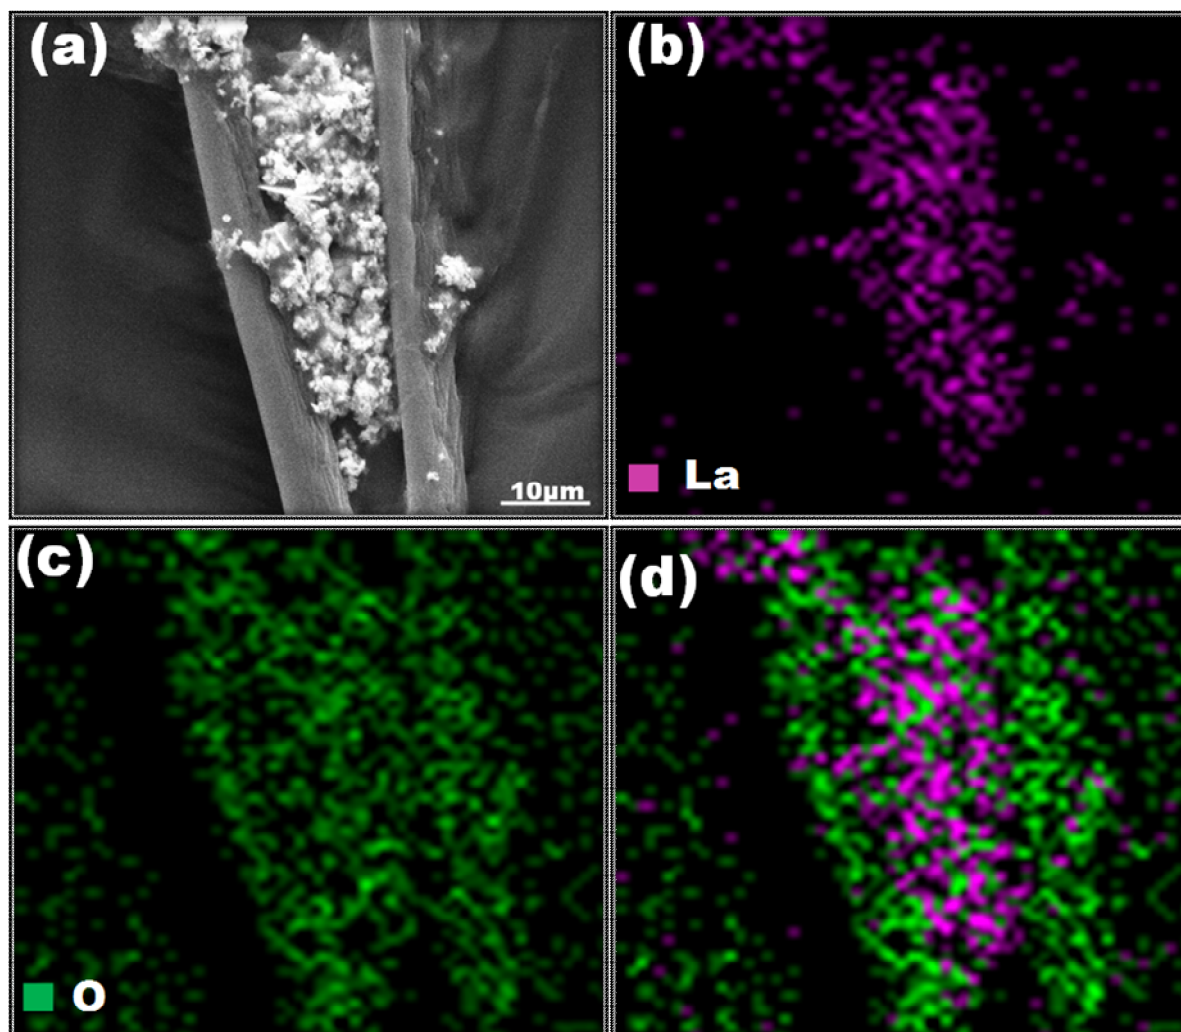

Figure S9: (a) SEM image of antenna from *D. magna* exposed to  $\text{La}_2\text{O}_3$  NP (48 h; 1000 mg/L). (b-d) EDS dot map of corresponding SEM image. It shows the attachment and distribution of lanthanum and oxygen on antenna.
